# Supplementary material
Source: MDPI journal article supplement (https://www.mdpi.com/2079-9292/13/7/1310)
Supplement: s1 [file s1 › Supplementary Materials S1.pdf]

### Participants' Self-Assessment Scale

Before filling out the form please carefully recall the emotions that arose when you just saw the stimulus paradigm and complete the table below:

1. The types of emotional triggers are: calmness, sadness, happiness, and fear, and the four emotional triggers are rated on a scale of 0-10, so please rate them according to the level of emotional triggers that you have induced.

2. Scoring rules:

- 1- Very poor level of emotional evocation
- 2- Poor level of emotional evocation
- 3- Fairly poor level of emotional evocation
- 4-Somewhat poor emotional evocation level
- 5-Good mood-evoking level
- 6-Somewhat good mood-evoking level
- 7-Average good mood-evoking level
- 8-Fairly good mood-evoking level
- 9-Very good mood-evoking level
- 10-Best mood-evoking level

| Experiment number |                                  |
|-------------------|----------------------------------|
| Evoke emotions    | Emotional evocation level scores |
| Calm              |                                  |
| Sad               |                                  |
| Happy             |                                  |
| Fear              |                                  |
